# Supplementary material
Source: MDPI journal article supplement (https://www.mdpi.com/2072-4292/8/7/571)
Supplement: s1 [file s1]

# Supplementary Materials: Multi-Resolution Mapping and Accuracy Assessment of Forest Carbon Density by Combining Image and Plot Data from a Nested and Clustering Sampling Design. *Remote Sens.* 2016, 8, 571

Enping Yan, Hui Lin, Guangxing Wang and Hua Sun

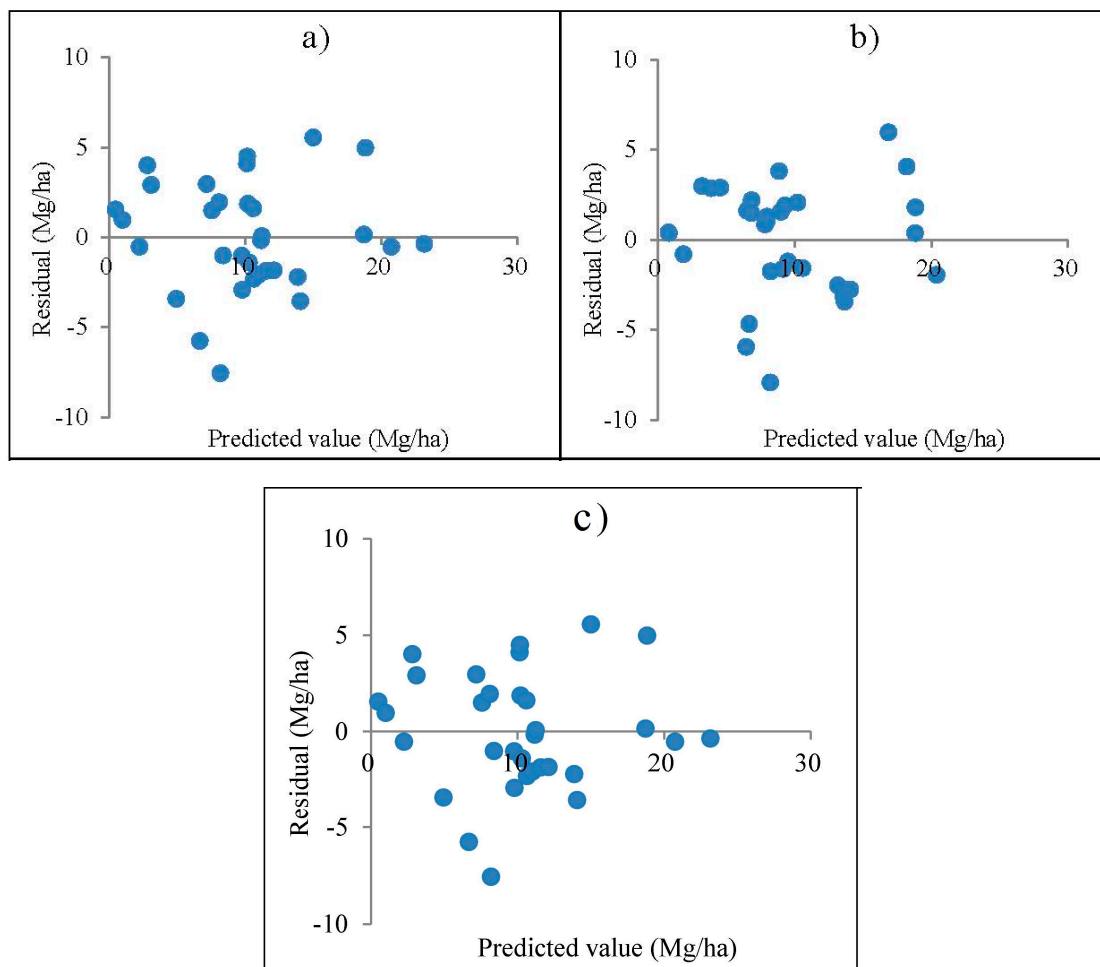

**Figure S1.** The residuals against the predicted values of forest carbon density at the spatial resolutions of (a) 250 m × 250 m, (b) 500 m × 500 m and (c) 1000 m × 1000 m by combining and scaling up Landsat 8 image and sample plot data using sequential Gaussian block co-simulation (SGBCS).

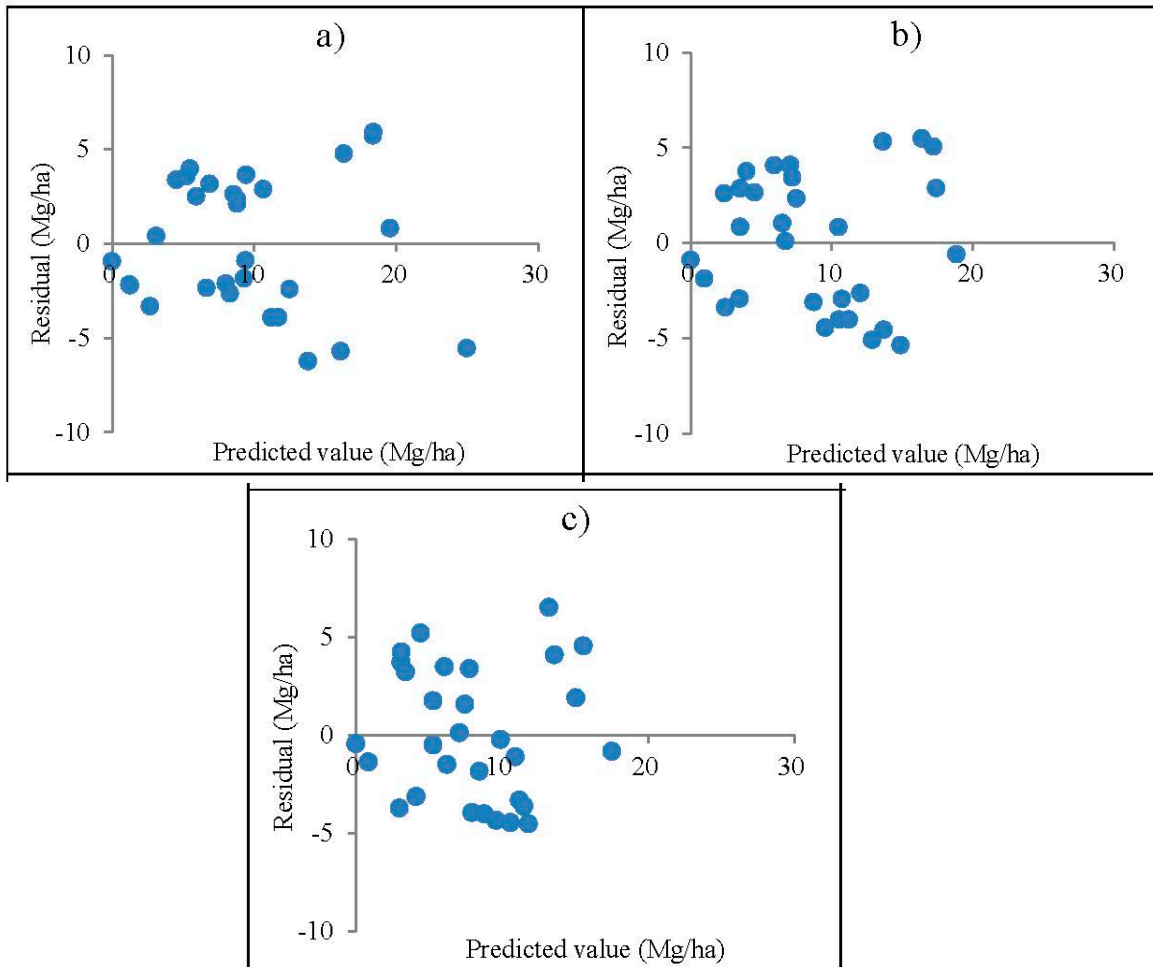

**Figure S2.** The residuals against the predicted values of forest carbon density by combining MODIS products and the reference values from the sample plots using sequential Gaussian co-simulation (SGCS) at the spatial resolutions of: (a) 250 m × 250; (b) 500 m × 500 m; and (c) 1000 m × 1000 m.

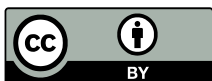

© 2016 by the authors; licensee MDPI, Basel, Switzerland. This article is an open access article distributed under the terms and conditions of the Creative Commons Attribution (CC-BY) license (<http://creativecommons.org/licenses/by/4.0/>).
